# Supplementary material for: A New Prognostic Indicator of Immune Microenvironment and Therapeutic Response in Lung Adenocarcinoma Based on Peroxisome-Related Genes
Source: Hindawi journal article supplement (doi:10.1155/2022/6084589), 2022-07-26

**A**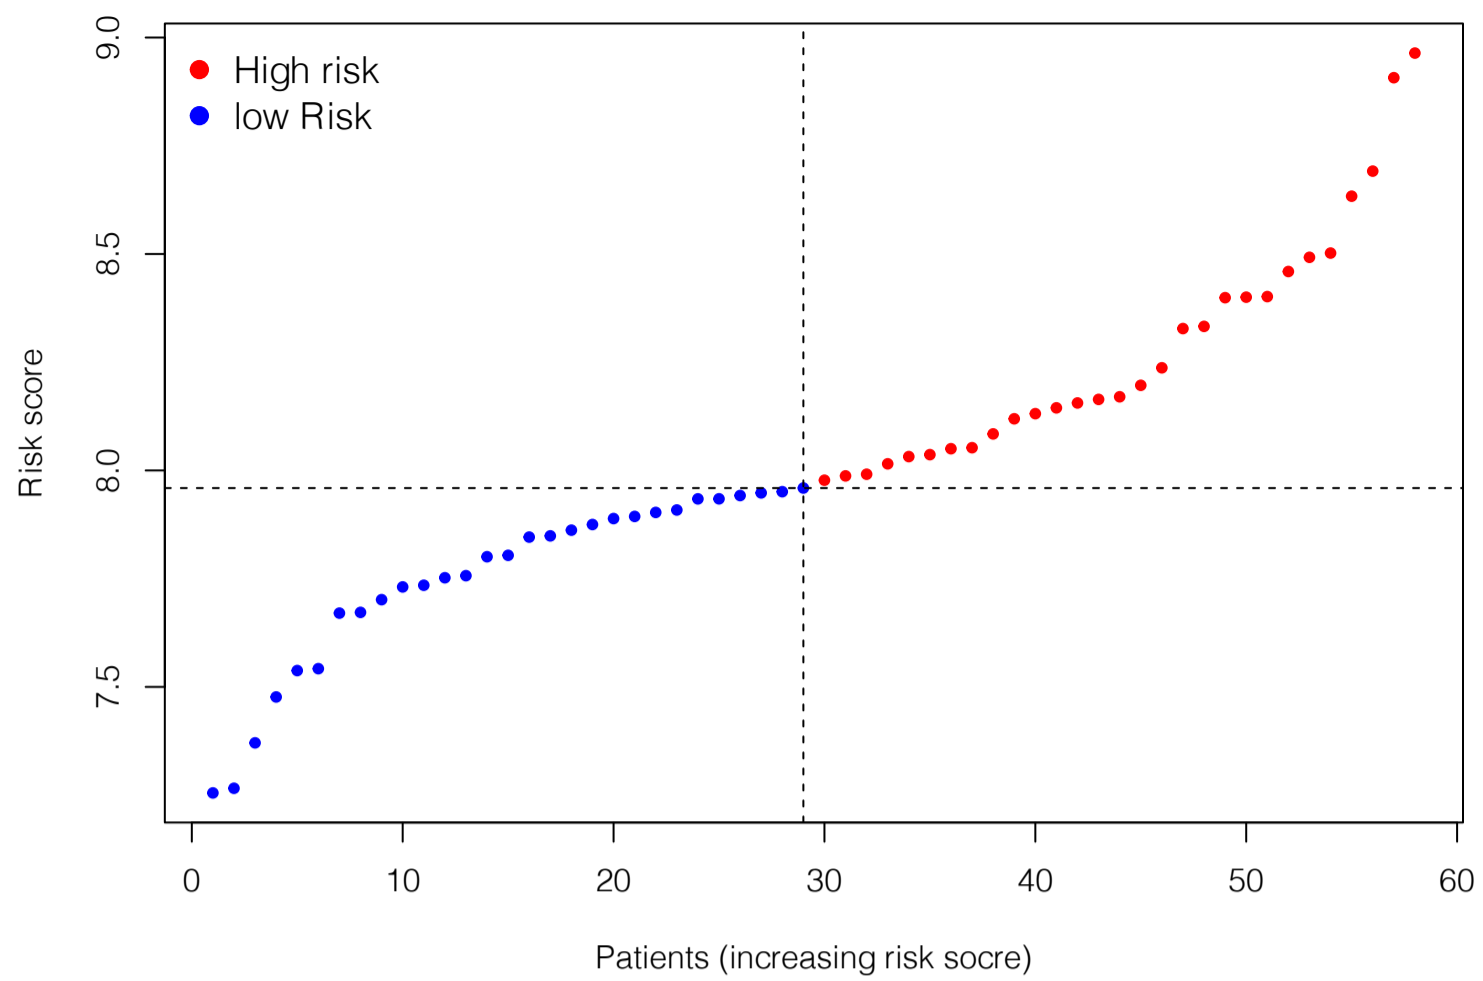**B**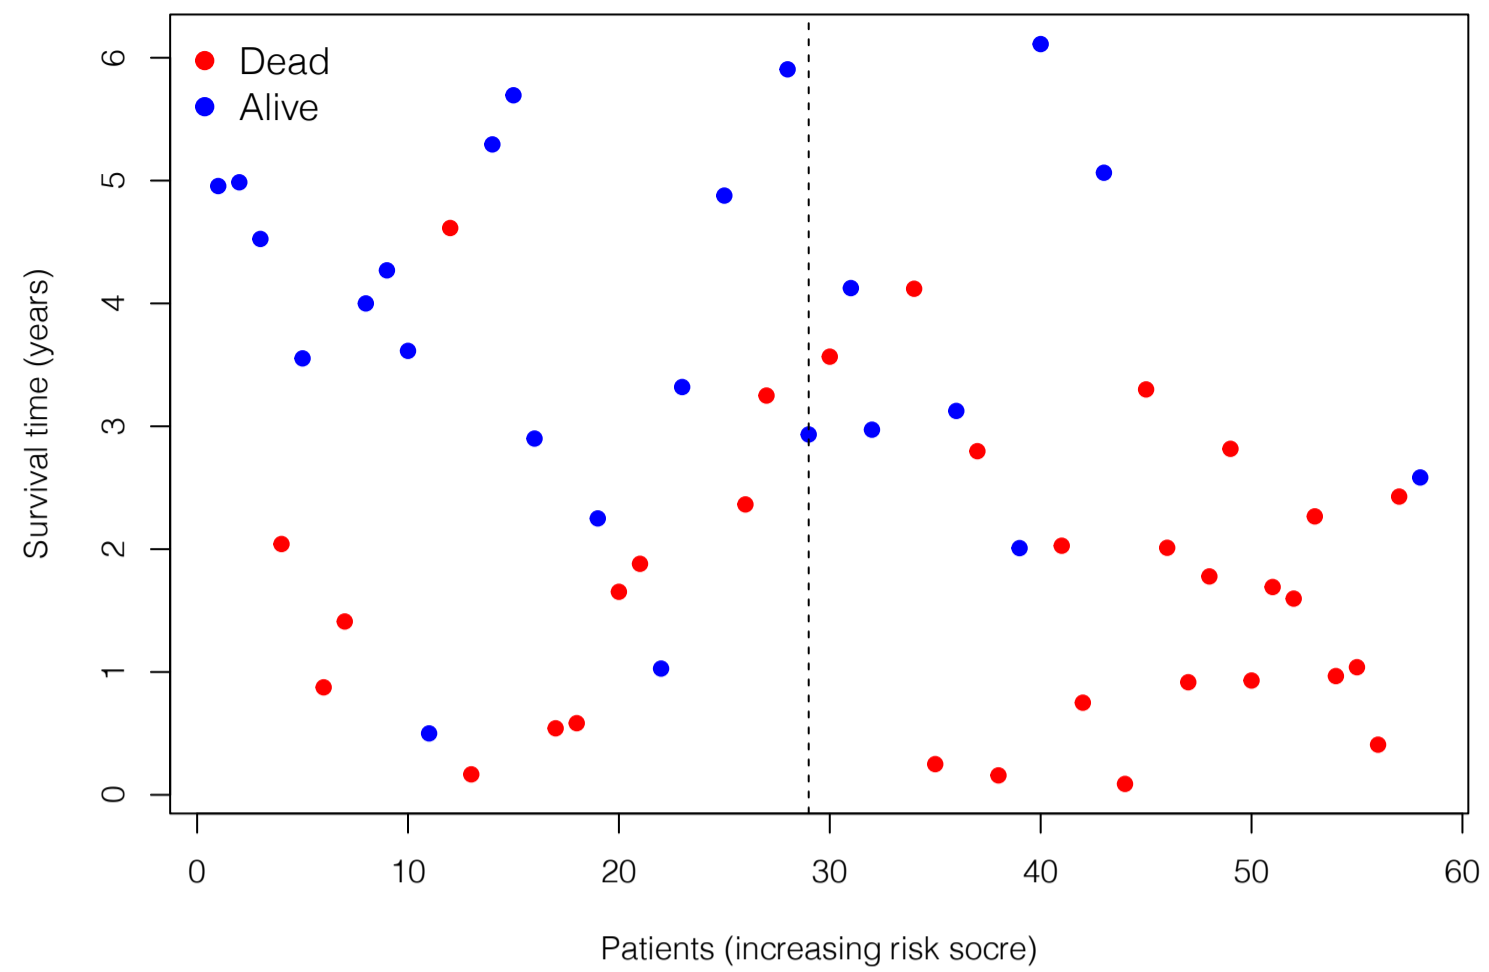**C**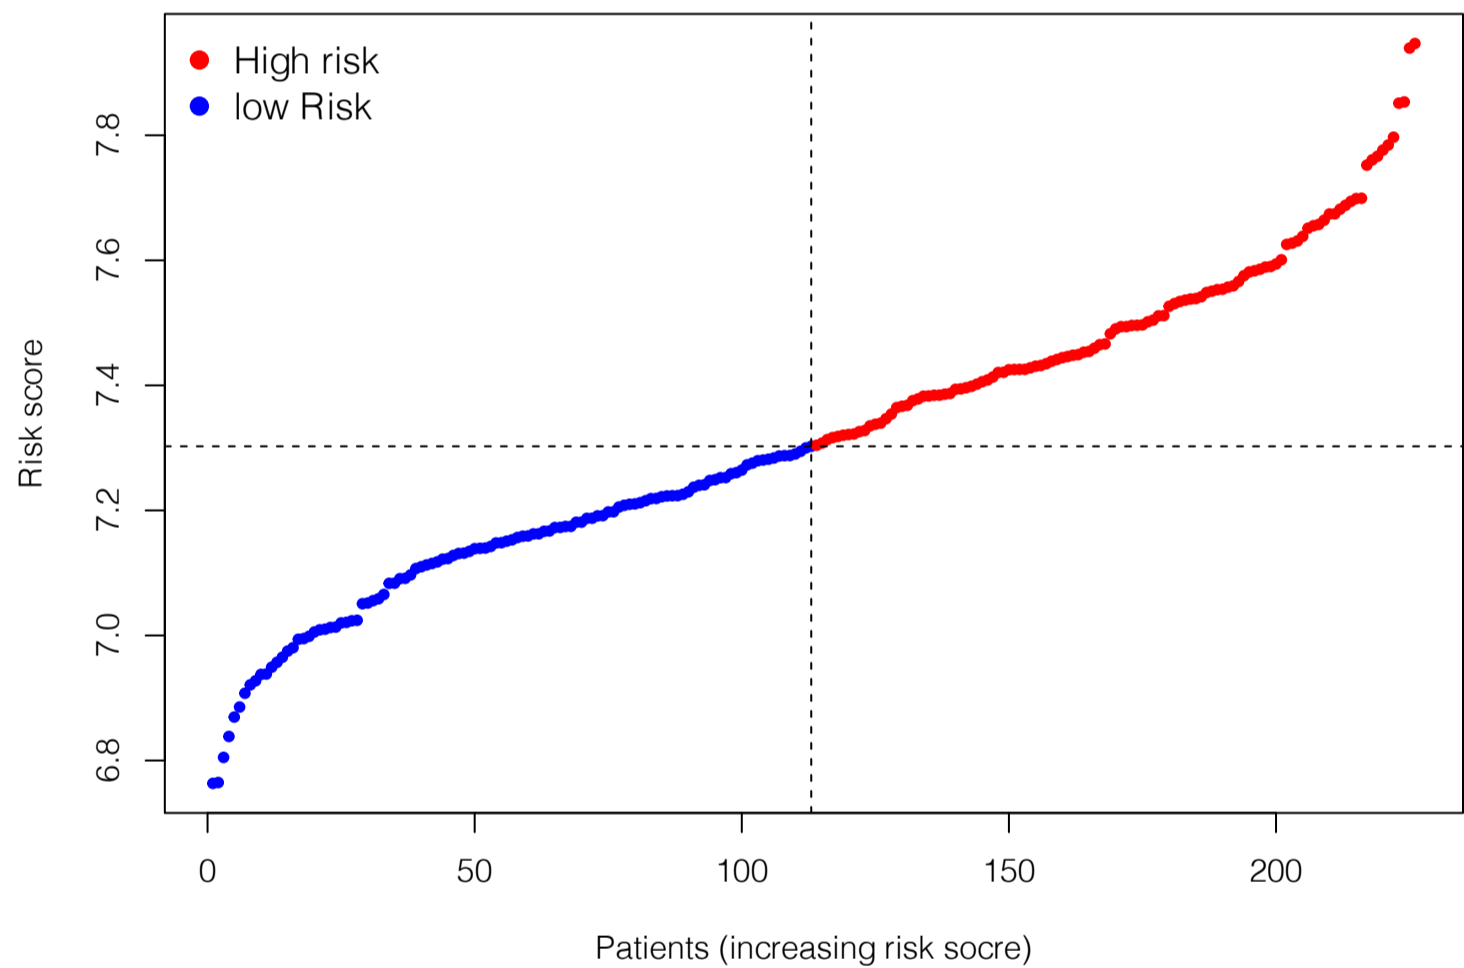**D**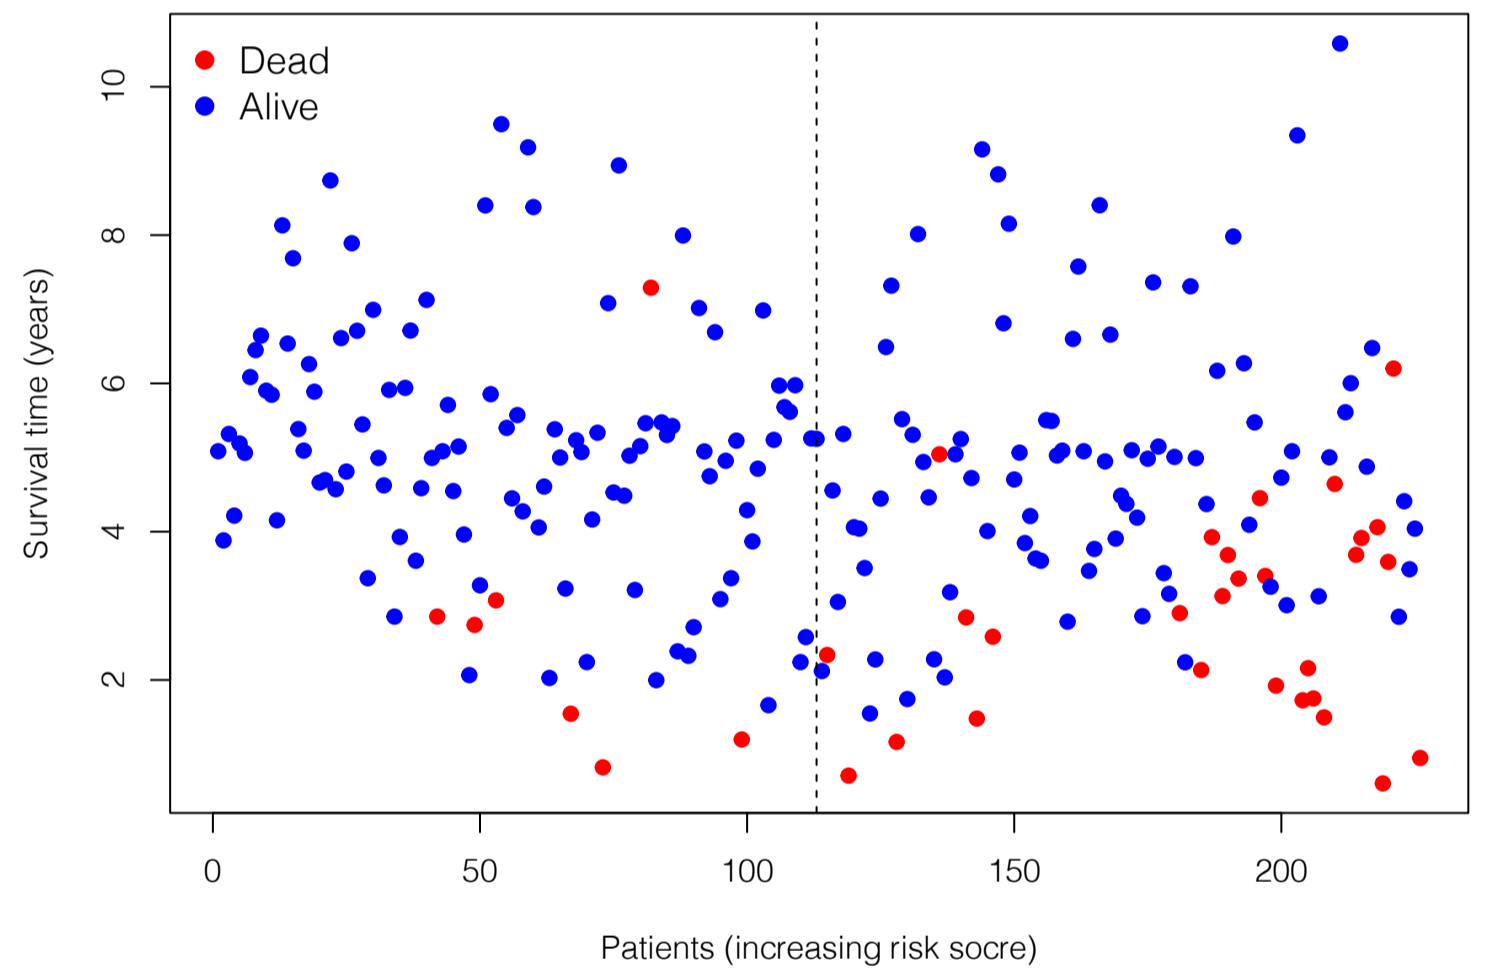**E**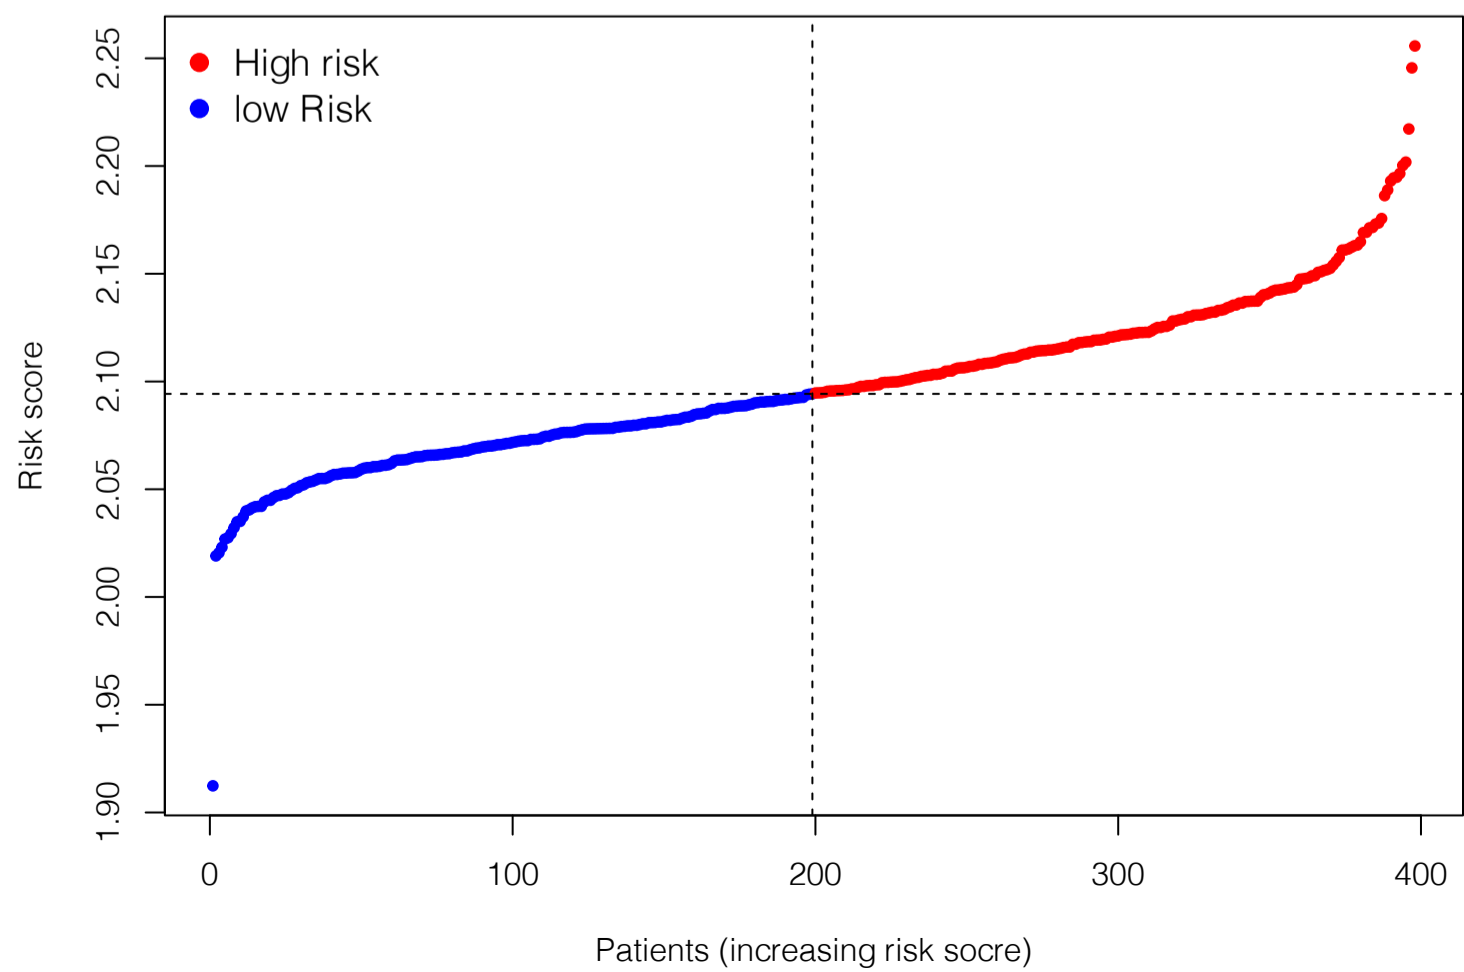**F**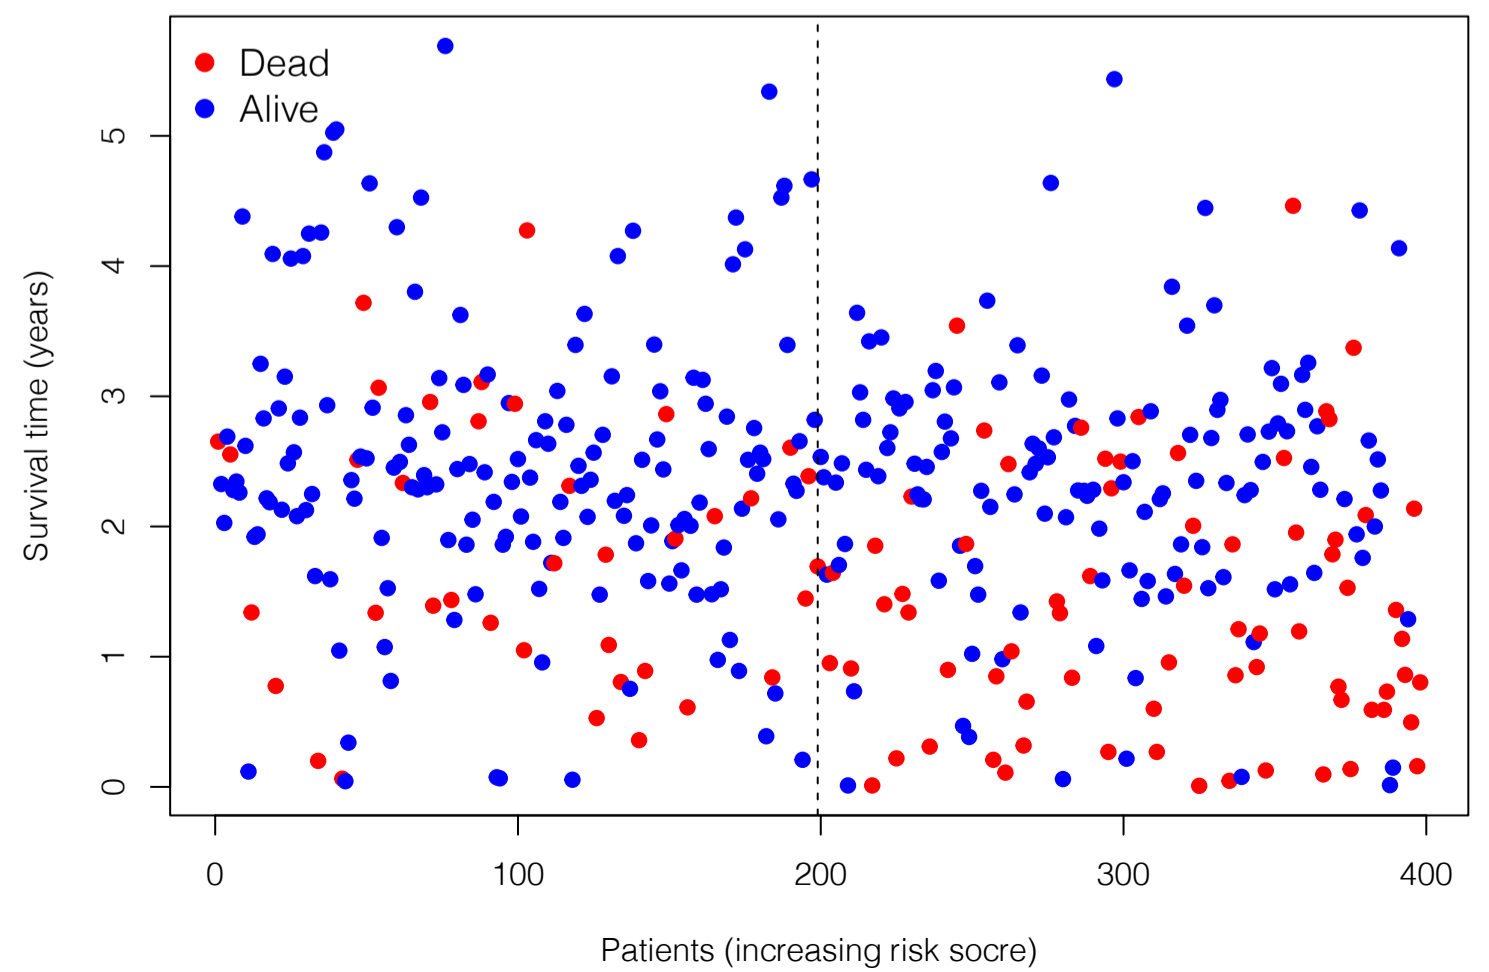

Supplement: f1 [file 6084589.f1.pdf]
